# Supplementary material for: Self-recoverable broadband near infrared mechanoluminescence from BaGa12O19:Cr3+ using a multi-site occupation strategy
Source: Royal Society of Chemistry journal article supplement (doi:10.1039/d4mh01918k), 2025-01-01
Supplement: d4mh01918k1.pdf [file d4mh01918k1.pdf]

# Supporting Information

## Self-recoverable broadband near infrared mechanoluminescence from BaGa<sub>12</sub>O<sub>19</sub>:Cr<sup>3+</sup> by multi-site occupation strategy

*Xuesong Wang<sup>a,#</sup>, Yao Xiao<sup>a,#</sup>, Puxian Xiong<sup>b,#,\*</sup>, Pan Zheng<sup>a</sup>, Sheng Wu<sup>c</sup>, Zhiyao Zhou<sup>c</sup>, Binli Xiao<sup>c</sup>, Peishan Shao<sup>a</sup>, Meihui Zhang<sup>a</sup>, Jianhui Liu<sup>a</sup>, Jiulin Gan<sup>a</sup>, Yan Wang<sup>a,d\*</sup> and Qi Qian<sup>a,\*</sup>*

- a. School of Materials Science and Engineering, Guangdong Provincial Key Laboratory of Fiber Laser Materials and Applied Techniques, Guangdong Engineering Technology Research and Development Center of Special Optical Fiber Materials and Devices, State Key Laboratory of Luminescent Materials and Devices, South China University of Technology, Guangzhou, 510640, China
- b. Department of Electrical and Electronic Engineering, The University of Hong Kong, Hong Kong, 999077, China
- c. Key Laboratory of Atomic and Subatomic Structure and Quantum Control (Ministry of Education), Guangdong Provincial Key Laboratory of Quantum Engineering and Quantum Materials, Guangdong-Hong Kong Joint Laboratory of Quantum Matter, Frontier Research Institute for Physics, School of Physics, South China Normal University, Guangzhou, 510006, China
- d. Qingyuan CSG energy-saving new materials Co., Ltd., Guangdong 511650, China

# Equally contributed to this work

\*Corresponding author.

E-mail:

P.X. Xiong: pxxiong@hku.hk

Y. Wang: gzwy@csgholding.com

Q. Qi: qianqi@scut.edu.cn

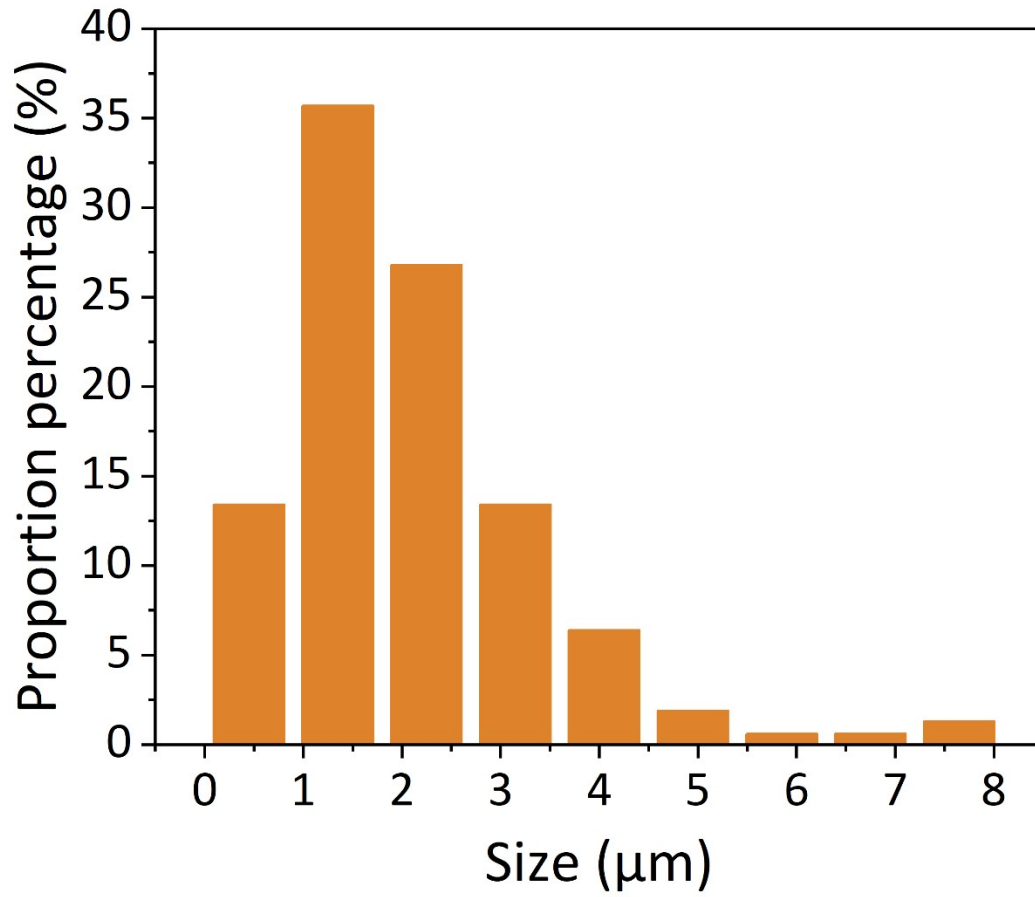

**Fig. S1** Particle size distribution of BaGa<sub>11.75</sub>O<sub>19</sub>:0.25Cr<sup>3+</sup>

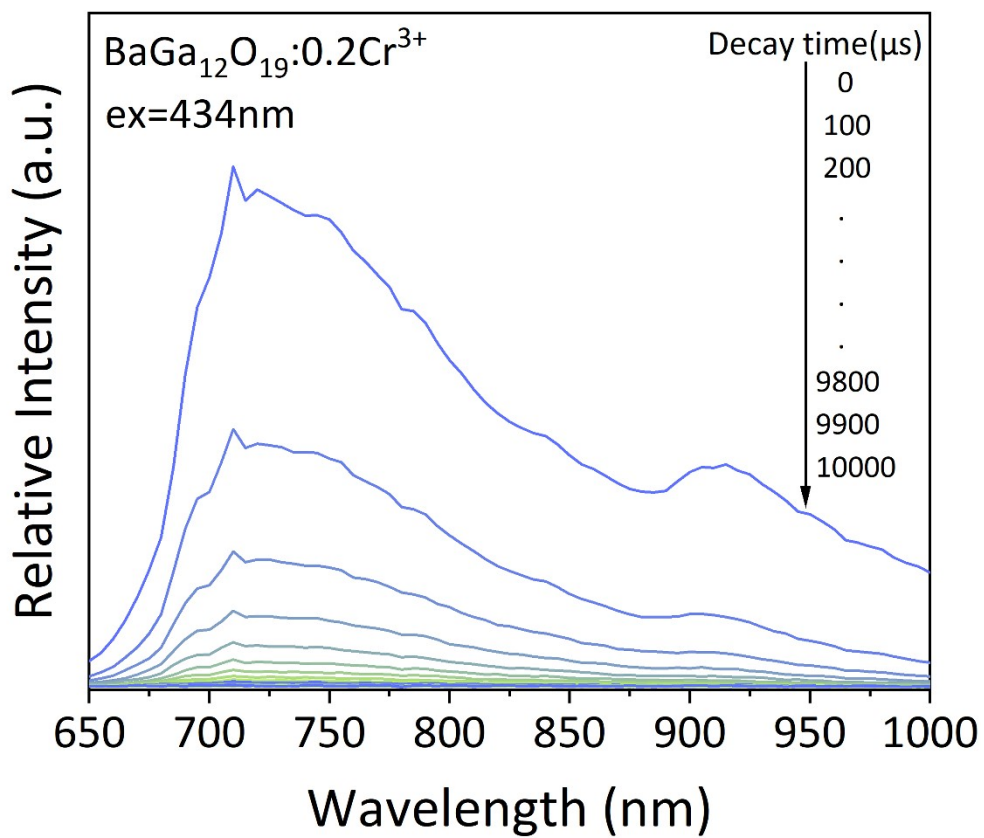

**Fig. S2** Time-resolved spectra of  $\text{BaGa}_{11.75}\text{O}_{19}:\text{0.25Cr}^{3+}$  sample upon excitation at 265 nm.

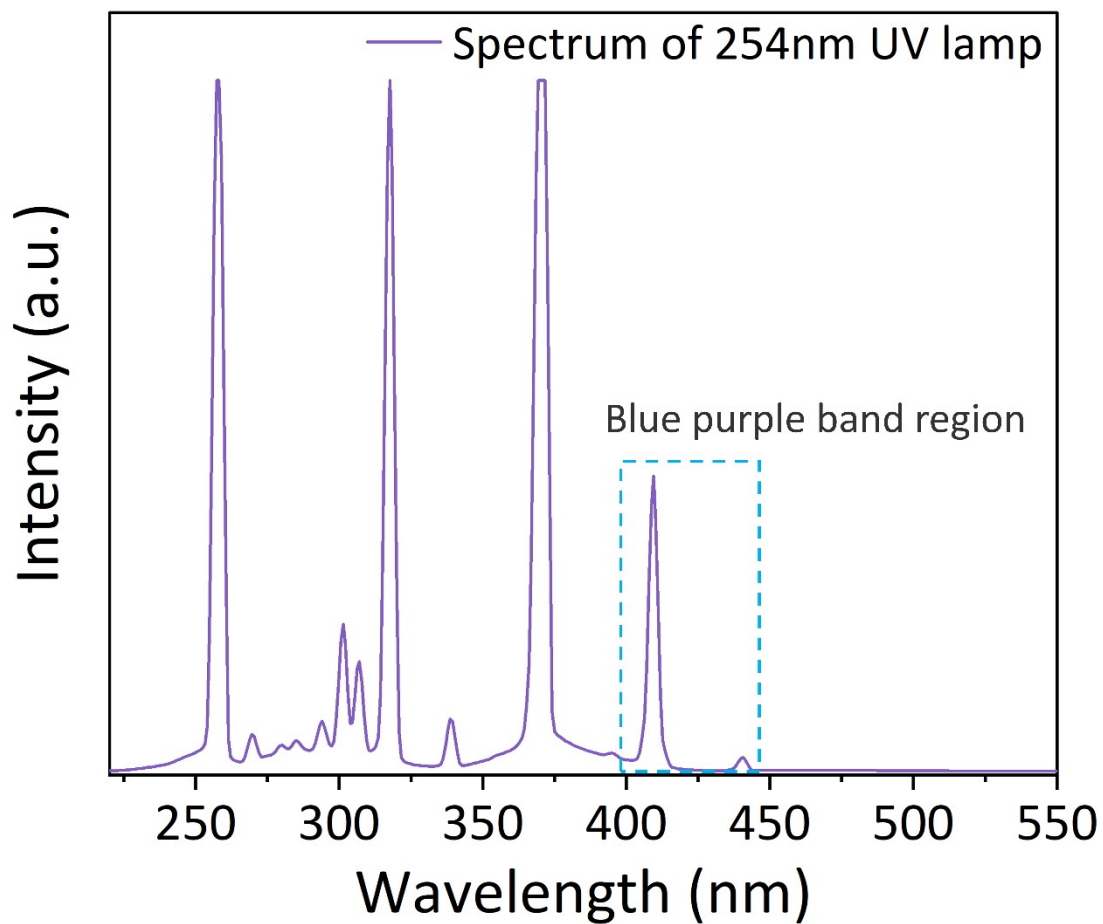

**Fig. S3** Spectrum of 254nm UV light source.

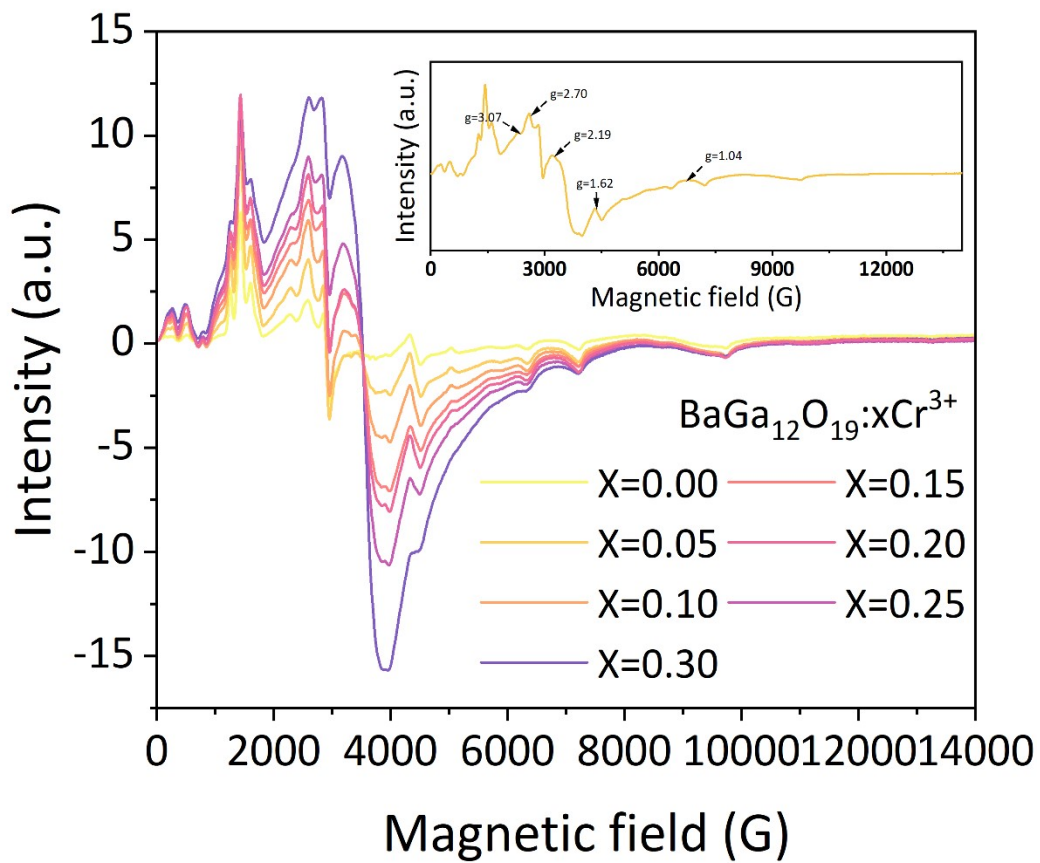

**Fig. S4** EPR curves measured of  $\text{BaGa}_{12-x}\text{O}_{19}:\text{xCr}^{3+}$  ( $x = 0-0.30$ )

**Table S1** The data related to the intensity and self-recovery ability of Cr<sup>3+</sup> ion-doped self-recovery ML materials

| ML Materials                                                         | Cycle times | Percentage of ML intensity before and after cycle testing | Intensity (a.u.) (2500N; stress) |
|----------------------------------------------------------------------|-------------|-----------------------------------------------------------|----------------------------------|
| BaGa <sub>12</sub> O <sub>19</sub> :Cr <sup>3+</sup>                 | 200         | 109.69%                                                   | 250                              |
| MgGa <sub>2</sub> O <sub>4</sub> :Cr <sup>3+</sup>                   | 40          | ~99.52%                                                   |                                  |
| LaAlO <sub>3</sub> :Cr <sup>3+</sup>                                 | 15          | ~42.08%                                                   | 113                              |
| Ga <sub>2</sub> O <sub>3</sub> :Cr <sup>3+</sup>                     | 10          | 90.00%                                                    | 290                              |
| LiGa <sub>5</sub> O <sub>8</sub> :Cr <sup>3+</sup>                   | 10          | ~92.41%                                                   | 90                               |
| Y <sub>3</sub> Ga <sub>3</sub> MgSiO <sub>12</sub> :Cr <sup>3+</sup> | 25          | ~119.50%                                                  |                                  |
| SrGa <sub>12</sub> O <sub>19</sub> :Cr <sup>3+</sup>                 | 100         | ~100.00%                                                  | 35                               |
| Ba <sub>2</sub> GaSbO <sub>6</sub> :Cr <sup>3+</sup>                 | 25          | ~71.73%                                                   |                                  |
| Sr <sub>2</sub> ScSbO <sub>6</sub> :Cr <sup>3+</sup>                 | 25          | ~66.67%                                                   |                                  |
| Sr <sub>2</sub> GaSbO <sub>6</sub> :Cr <sup>3+</sup>                 | 25          | ~66.95%                                                   |                                  |
